# Supplementary material for: Single strand gap repair: The presynaptic phase plays a pivotal role in modulating lesion tolerance pathways
Source: PubMed Central journal article supplement (PMC9203016; doi:10.1371/journal.pgen.1010238), 2022-06-02
Supplement: pgen.1010238.s001.pdf [file pgen.1010238.s001.pdf]

**S1 Table : *E. coli* strains used in this study**

| Name         | Short name                    | Genotype                                                                                                              |
|--------------|-------------------------------|-----------------------------------------------------------------------------------------------------------------------|
| EVP22/23     | Parental strain               | FBG151/152 <i>uvrA</i> :: <i>frt mutS</i> :: <i>frt</i>                                                               |
| EVP146/147   | <i>recO</i>                   | FBG151/152 <i>uvrA</i> :: <i>frt mutS</i> :: <i>frt recO</i> :: <i>frt</i>                                            |
| EVP195/196   | <i>recQ</i>                   | FBG151/152 <i>uvrA</i> :: <i>frt mutS</i> :: <i>frt recQ</i> :: <i>frt</i>                                            |
| EVP210/211   | <i>Oc_polB</i>                | FBG151/152 <i>uvrA</i> :: <i>frt mutS</i> :: <i>frt frt</i> :: <i>Oc_polB</i>                                         |
| EVP223/224   | <i>O+_UmuD'C</i>              | FBG151/152 <i>uvrA</i> :: <i>frt mutS</i> :: <i>frt frt</i> :: <i>o+_umuD'C</i>                                       |
| EVP602/603   | <i>recO recF</i>              | FBG151/152 <i>uvrA</i> :: <i>frt mutS</i> :: <i>frt recO</i> :: <i>frt recF</i> ::Kan                                 |
| EVP347/348   | <i>recI</i>                   | FBG151/152 <i>uvrA</i> :: <i>frt mutS</i> :: <i>frt recI</i> :: <i>frt</i>                                            |
| EVP357/358   | <i>O+_UmuD'C recI</i>         | FBG151/152 <i>uvrA</i> :: <i>frt mutS</i> :: <i>frt recI</i> :: <i>frt frt</i> :: <i>o+_umuD'C</i>                    |
| EVP359/360   | <i>O+_UmuD'C recQ</i>         | FBG151/152 <i>uvrA</i> :: <i>frt mutS</i> :: <i>frt recQ</i> :: <i>frt frt</i> :: <i>o+_umuD'C</i>                    |
| EVP433/434   | <i>ruvAB recG</i>             | FBG151/152 <i>mutS</i> :: <i>frt uvrA</i> :: <i>frt ruvAB</i> :: <i>frt recG</i> :: <i>frt</i>                        |
| EVP498/499   | <i>phrB recF</i>              | FBG151/152 <i>uvrA</i> :: <i>frt mutS</i> :: <i>frt phrB</i> :: <i>frt recF</i> :: <i>frt</i>                         |
| EVP588/589   | <i>recJ recF</i>              | FBG151/152 <i>uvrA</i> :: <i>frt mutS</i> :: <i>frt recJ</i> :: <i>frt recF</i> :: <i>frt</i>                         |
| EVP615/616   | <i>recQ recF</i>              | FBG151/152 <i>uvrA</i> :: <i>frt mutS</i> :: <i>frt recQ</i> :: <i>frt recF</i> :: <i>frt</i>                         |
| EVP712/713   | <i>lexA ind-</i>              | FBG151/152 <i>uvrA</i> :: <i>frt mutS</i> :: <i>frt LexA (ind-)</i>                                                   |
| EVP963/964   | <i>recQ recI</i>              | FBG151/152 <i>uvrA</i> :: <i>frt mutS</i> :: <i>frt recQ</i> :: <i>frt recI</i> :: <i>frt</i>                         |
| EVP975/976   | <i>recF recI polB</i>         | FBG151/152 <i>uvrA</i> :: <i>frt mutS</i> :: <i>frt polB</i> :: <i>frt recF</i> :: <i>Cm recI</i> :: <i>frt</i>       |
| EVP981/982   | <i>recF recI O+_UmuD'C</i>    | FBG151/152 <i>uvrA</i> :: <i>frt mutS</i> :: <i>frt recI</i> :: <i>frt frt</i> :: <i>o+_umuD'C recF</i> :: <i>frt</i> |
| EVP993/994   | <i>recR</i>                   | FBG151/152 <i>uvrA</i> :: <i>frt mutS</i> :: <i>frt recR</i> :: <i>frt</i>                                            |
| EVP989/990   | <i>phrB recF recO</i>         | FBG151/152 <i>uvrA</i> :: <i>frt mutS</i> :: <i>frt phrB</i> :: <i>frt recF</i> :: <i>frt recO</i> :: <i>frt</i>      |
| EVP1006/1007 | <i>lexA ind- recF</i>         | FBG151/152 <i>uvrA</i> :: <i>frt mutS</i> :: <i>frt LexA (ind-) recF</i> :: <i>frt</i>                                |
| EVP1010/1011 | <i>recF recI umuDC</i>        | FBG151/152 <i>uvrA</i> :: <i>frt mutS</i> :: <i>frt recI</i> :: <i>frt recF</i> :: <i>frt umuDC</i> :: <i>frt</i>     |
| EVP1016/1017 | <i>lexA ind- Oc_polB</i>      | FBG151/152 <i>uvrA</i> :: <i>frt mutS</i> :: <i>frt LexA (ind-) Oc_PolB</i> :: <i>frt</i>                             |
| EVP1018/1019 | <i>lexA ind- recF Oc_polB</i> | FBG151/152 <i>uvrA</i> :: <i>frt mutS</i> :: <i>frt LexA (ind-) recF</i> :: <i>frt Oc_PolB</i> :: <i>frt</i>          |
| EC13/14      | Parental strain               | EC1/EC2 <i>uvrA</i> :: <i>frt mutS</i> :: <i>frt</i>                                                                  |
| EC39/40      | <i>recO</i>                   | EC1/EC2 <i>uvrA</i> :: <i>frt recO</i> :: <i>frt mutS</i> :: <i>frt</i>                                               |
| EC49/50      | <i>recO recF</i>              | EC1/EC2 <i>uvrA</i> :: <i>frt recO</i> :: <i>frt mutS</i> :: <i>frt recF</i> :: <i>frt</i>                            |
| EC51/52      | <i>recF</i>                   | EC1/EC2 <i>uvrA</i> :: <i>frt recF</i> :: <i>frt mutS</i> :: <i>frt</i>                                               |

**FBG151** = MG1655  $\Delta$ lacI Z  $\Delta$ attB $\lambda$ ::attR $\lambda$ -3' lacZ-aadA (lesion inserted in the lagging orientation compared to replication)

**FBG152** = MG1655  $\Delta$ lacI Z  $\Delta$ attB $\lambda$ ::3' lacZ-attR $\lambda$ -aadA (lesion inserted in the leading orientation compared to replication)

**EC1** = MG1655  $\Delta$ lacI-lacZ::*frt*  $\Delta$ attB $\lambda$ ::attR $\lambda$ -3' lacZ-aad intergenic(aqpZ-ybjD)::high pTRC  $\lambda$  int-xis lacIq

**EC2** = MG1655  $\Delta$ lacI-lacZ::*frt*  $\Delta$ attB $\lambda$ ::3' lacZ-attR $\lambda$ -aad intergenic(aqpZ-ybjD)::high pTRC  $\lambda$  int-xis lacIq
