# Supplementary material for: Single strand gap repair: The presynaptic phase plays a pivotal role in modulating lesion tolerance pathways
Source: PubMed Central journal article supplement (PMC9203016; doi:10.1371/journal.pgen.1010238), 2022-06-02
Supplement: pgen.1010238.s003.pdf [file pgen.1010238.s003.pdf]

## S2 Figure

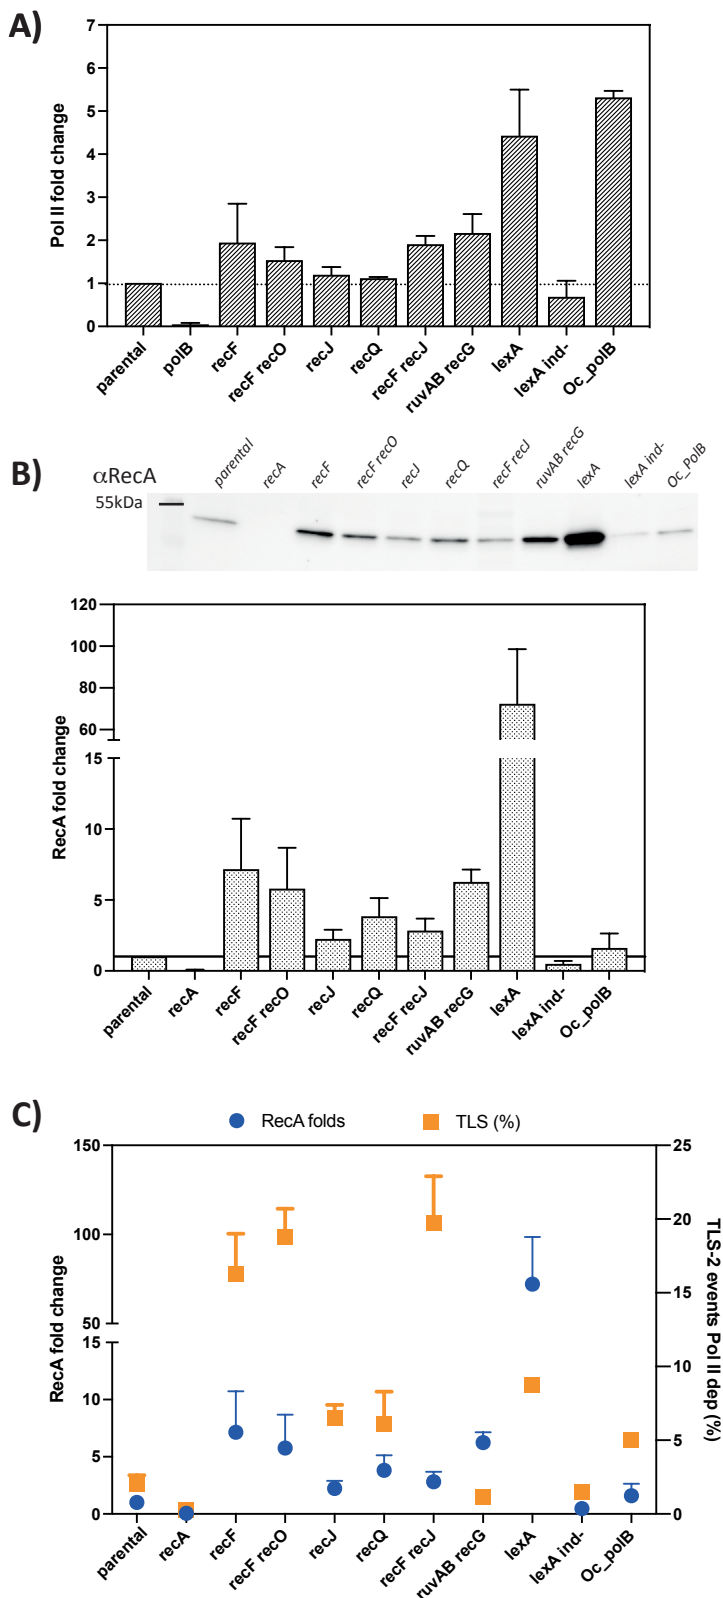

### S2 Figure :

**A)** Quantification of Pol II fold change expression level (compared to the parental strain).

The data represent the average and standard deviation of 2-3 independent experiments.

**B)** Western blot measuring the expression level of RecA. As negative control *recA* deficient strain was used, while the *lexA* strain was used as positive control. Below the quantification of RecA fold change compared to the parental strain. The data represent the average and standard deviation of 2-3 independent experiments.

**C)** Graph correlating the RecA fold change with the percentage of Pol II TLS events measured with our in vivo genetic system.
